# Supplementary material for: Microbiota, Microbial Metabolites, and Barrier Function in A Patient with Anorexia Nervosa after Fecal Microbiota Transplantation
Source: PubMed Central journal article supplement (PMC6780752; doi:10.3390/microorganisms7090338), 2019-09-10
Supplement: microorganisms-07-00338-s001.pdf [file microorganisms-07-00338-s001.pdf]

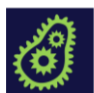

## 1 Supplementary Materials and Methods

### 2 NMR- and MS-Based Metabolomic Analysis of the Stool Samples

#### 3 *Sample Preparation*

4 Stool samples for NMR and MS analyses were obtained by extraction of approx. 100 mg aliquot  
5 with 1 mL of water (MS-LC grade). The mixture was then vortexed till completely homogenized and  
6 centrifuged at 6.000 rpm. The supernatant was filtered through a syringe filter (Whatman 25 mm  
7 GD/X PP, pore size 0.2  $\mu$ m). The filter was then rinsed with 0.5 mL H<sub>2</sub>O. In the case of NMR samples,  
8 1 mL of mixture methanol:dichloromethane (2:1) (MS-LC grade, biotech. grade) was added to the  
9 collected filtrate. The mixture was vortexed and centrifuged at 14.000 rpm for 30 min (5 °C). The  
10 upper hydrophilic phase was transferred to a fresh tube and evaporated on Speedvac (35 °C) and  
11 stored at – 80 °C till analysis. The dried matter was re-dissolved in 450  $\mu$ L D<sub>2</sub>O and 50  $\mu$ L phosphate  
12 buffer (1.5 M KH<sub>2</sub>PO<sub>4</sub> in D<sub>2</sub>O containing 2 mM NaN<sub>3</sub> and 0.1% (w/v) trimethylsilyl propionic acid  
13 (TSP), pH 7.4) and transferred to a 5-mm NMR tube.

14 In the case of MS samples, 200  $\mu$ L aliquot of water extract was transported to a fresh tube and  
15 underwent derivatization following user's manual instruction in the EZ:fast kit (Phenomenex, USA).  
16 In the workflow, it was necessary to optimize the pH of the extract by the addition of 1  $\mu$ L formic  
17 acid to reach pH suitable for solid phase extraction.

#### 18 *NMR Analysis*

19 The NMR spectra were recorded on a 600 MHz Bruker Avance III spectrometer (Bruker BioSpin,  
20 Rheinstetten, Germany) equipped with a 5-mm TCI cryogenic probe head. All NMR experiments  
21 were performed at 300 K. Standard <sup>1</sup>H NMR spectra were acquired using nuclear Overhauser effect  
22 spectroscopy (NOESY) pulse sequence with following acquisition parameters: number of scans (NS)  
23 = 256, 64k of data points (TD), spectral width (SW) of 20 ppm, relaxation delay (D1) of 4 s. The  
24 resonance of water was suppressed by presaturation during the relaxation delay. J-resolved  
25 experiment with presaturation (NS=4, SW=16 ppm, TD=8k, number of increments=40, SW=78.125 Hz  
26 in the indirect dimension, and relaxation delay=2 s) was performed to facilitate the identification of  
27 metabolites.

28 The raw spectral data were processed using TopSpin 3.6 software (Bruker BioSpin, Rheinstetten,  
29 Germany). The free induction decays were multiplied by an exponential window function (LB = 0.3  
30 Hz). The spectra were automatically phased, baseline corrected and referenced to TSP (0.0 ppm).  
31 Next, the spectral baselines were adjusted, the spectra were binned and normalized, all procedures  
32 using MATLAB software ('MATLAB version 9.2 (R2017a).

33 The calculated intensities were normalized by probabilistic quotient normalization [1] with a  
34 group of samples from the patient as a reference. The metabolites' identification was carried out using  
35 the Chenomx NMR Suite 7.7 database (Chenomx Inc., Edmonton, AB, Kanada). Signals of short-chain  
36 fatty acids acetate (methyl group at 1.92 ppm), butyrate (methyl group at 0.90 ppm), and propionate  
37 (methyl group at 1.06 ppm) were quantified using normalized intensities of corresponding signals.

#### 38 *MS Analysis*

39 The analysis was conducted in SRM mode using TSQ Quantum Access Max mass spectrometry  
 40 (Thermo Fisher Scientific, Inc., USA). The MS/MS parameters were optimized using direct infusion  
 41 (10 mg/L in the mobile phase, 20  $\mu$ L/min) in positive ionization mode of serotonin, 5-  
 42 hydroxytryptophan, tryptophan and kynurenine standards (AlfaAesar, UK). The parameters are  
 43 shown in Table S1. The calibration curve was constructed in the concentration range from 10 to 1000  
 44 pmol/mL. The capacity of the solid phase extraction column was tested by extraction of 50, 100 and  
 45 200 mg of feces.

46 **Table S1.** SRM parameters.

| Metabolites         | parent ion | product ions | collision energy (V) | tube lens voltage (V) | retention time (min) |
|---------------------|------------|--------------|----------------------|-----------------------|----------------------|
| Tryptophan          | 333.0      | 245, 273     | 17, 12               | 68                    | 9.1                  |
| 5-hydroxytryptophan | 435.1      | 201, 375     | 29, 12               | 69                    | 11.6                 |
| Kynurenine          | 423.0      | 146, 260     | 33, 15               | 64                    | 15.5                 |
| Serotonin           | 349.1      | 160, 203     | 30, 17               | 60                    | 8.4                  |

47 TSQ MS detector was equipped by HESI-II probe run under the following conditions: spray  
 48 voltage +2250 V, vaporizer temperature 320  $^{\circ}$ C, sheath gas pressure 34 arbitrary units (AU), auxiliary  
 49 gas pressure 15 AU, ion sweep gas pressure 11.2 AU, collision gas (Ar) pressure 1.0 mTorr, capillary  
 50 temperature 320  $^{\circ}$ C. Skimmer offset voltage was not used. Data were processed by software  
 51 ThermoXcalibur (Thermo Fisher Scientific, Inc., USA). The peaks area was normalized by the area of  
 52 internal standard and raw stool sample weight.

### 53 **Quantification of Intestinal Microbiota by qPCR**

54 The amplifications were performed in 25  $\mu$ l reaction mixtures (Sybr green master mix, Bio-Rad)  
 55 containing the same amount of gDNA template in each sample (40 ng). The sequences and origins of  
 56 primers are shown in Table S2 [2-4]. Cycling parameters were as follows: 4 min at 94  $^{\circ}$ C, 35 cycles of  
 57 10 s at 94  $^{\circ}$ C, 25 s at 60  $^{\circ}$ C, and 35 s at 72  $^{\circ}$ C, and a final extension for 7 min at 72  $^{\circ}$ C. Amplifications  
 58 were carried out in duplicates. The specificities of all used primers and amplified products were  
 59 checked by melting curve and by sequencing. The PCR fragments of corresponding genes were  
 60 ligated into the pCR2.1-TOPO cloning vector (Life Technologies) with subsequent transformation  
 61 into chemically competent *E. coli* cells (Neb 5-alpha *E. coli*, Bio Labs). To obtain their linear form,  
 62 plasmids were cut with BamH1 restriction endonuclease (37  $^{\circ}$ C, 12 hours). Plasmids were then  
 63 purified by PureLink Quick Plasmid Kit (Thermo Fisher Scientific Baltics, UAB, Vilnius, Lithuania).  
 64 The experiments were performed three times from DNA isolated from 3 distinct parts of the stools.

### 65 **High Throughput Sequencing of Microbiota Composition**

66 Total extracted gDNA from stool samples was used for high throughput sequencing (Miseq  
 67 platform, Illumina) of the bacterial V4 region of 16S rRNA gene and fungal ITS region. Two sets of  
 68 specific primers with barcodes (Table S2) were used in PCR using KAPA 2G Robust Hot Start DNA  
 69 Polymerase (Kapa Biosystems) were carried out with 25 and 27 cycles, respectively [5,6]. The PCR  
 70 products were purified and normalized with the SequalPrep<sup>TM</sup> Normalization Plate Kit  
 71 (ThermoFisher Scientific). Triplicates of the amplicons were pooled and ligated with sequencing  
 72 adapters (TruSeq DNA PCR-free LT Sample Preparation Kit, Illumina), pooled in equimolar  
 73 concentrations, and sequenced. The library was validated by a KAPA Library Quantification Kit  
 74 (Illumina). The amplicons were sequenced on an Illumina MiSeq using a Miseq Reagent Kit v3  
 75 (Illumina).

76 The amplicon sequencing data were processed with SEED v2.1 [7] applying standard procedures  
 77 such as through quality control and data filtering, clustering analysis, and diversity determination.  
 78 Pair-end reads were joined using fastq-join [8]. Chimeric sequences were detected using algorithm

79 UCHIME, deleted, and clustered using UPARSE at a 97% similarity level, both of which were  
 80 conducted with USEARCH 8.1.1861 [9]. The most abundant sequences were chosen as one  
 81 representative strain per cluster, and the closest hits at the genus level were identified using the RDP  
 82 database for bacteria [10] or UNITE database for fungi [11]. The dataset obtained in this study was  
 83 deposited in the NCBI Sequence Read Archive (raw demultiplexed sequencing data with sample  
 84 annotations, PRJNA542274). Singletons were excluded from all analyses.

85 **Table S2.** Primers used in qPCR and for HTS.

| Name    | Sequence (5'–3')            | Target                    | References                      |
|---------|-----------------------------|---------------------------|---------------------------------|
| BAC     | CGGCAACGAGCGCAACCC          | univ. bact. 16S           | Denman and<br>McSweeney<br>2006 |
| BAC     | CCATTGTAGCACGTGTGTAGCC      | rRNA                      |                                 |
| AM1129F | CAGCACGTGAAGGTGGGGAC        | <i>A. muciniphila</i> 16S | Collado et al.<br>2007          |
| AM1437R | CCTTGCGGTTGGCTTCAGAT        | rRNA                      |                                 |
| MS534F  | CCGGGTATCTAATCCGGTTC        | <i>M. smithii</i> 16S     | Dridi et al. 2009               |
| MS656R  | CTCCCAGGGTAGAGGTGAAA        | rRNA                      |                                 |
| 515F    | xxxxxxxGTGCCAGCMGCCGCGGTAA  | univ. bact. 16S           | Caporoso et al.<br>2011         |
| 806R    | xxxxxxxGGACTACHVGGGTWTCTAAT | rRNA                      |                                 |
| gITS7   | xxxxxxxGTGARTCATCGARTCTTTG  | univ. fungal ITS          | Ihrmark et al.<br>2012          |
| gITS4   | xxxxxxxTCCTCCGCTTATTGATATGC | DNA                       |                                 |

86 X represents a barcode base with linkers.

## 87 Supplementary Results

### 88 Taxonomic Composition of the Microbial Community

89 To determine the composition of microbiota in stool samples, isolated gDNA was used for the  
 90 microbiome analysis by HTS. All sequences with mismatches in tags were removed from the dataset,  
 91 and a total of 1,261,800 bacterial and 1,193,130 fungal sequences were retained after the removal of  
 92 low-quality sequences (with mean Phred quality score threshold of 30) and sequences shorter than  
 93 200 bases. It yielded 1,088,645 bacterial and 906,470 fungal sequences which were clustered to  
 94 operational taxonomic units (OTUs) with 97% similarity threshold (166,165 bacterial and 1,063  
 95 fungal chimeric sequences and 2,975 bacterial and 406 fungal singletons were excluded during this  
 96 step). The 1,153 bacterial OTUs were classified into 8 phyla and 156 genera. The 754 fungal OTUs  
 97 were classified into 5 phyla and 270 genera. Most of the OTUs were identified at the genus level;  
 98 however, identification down to the species level was impossible owing to database limitations. The  
 99 total number and proportional distribution of OTUs among different phyla are shown in Figure 3.

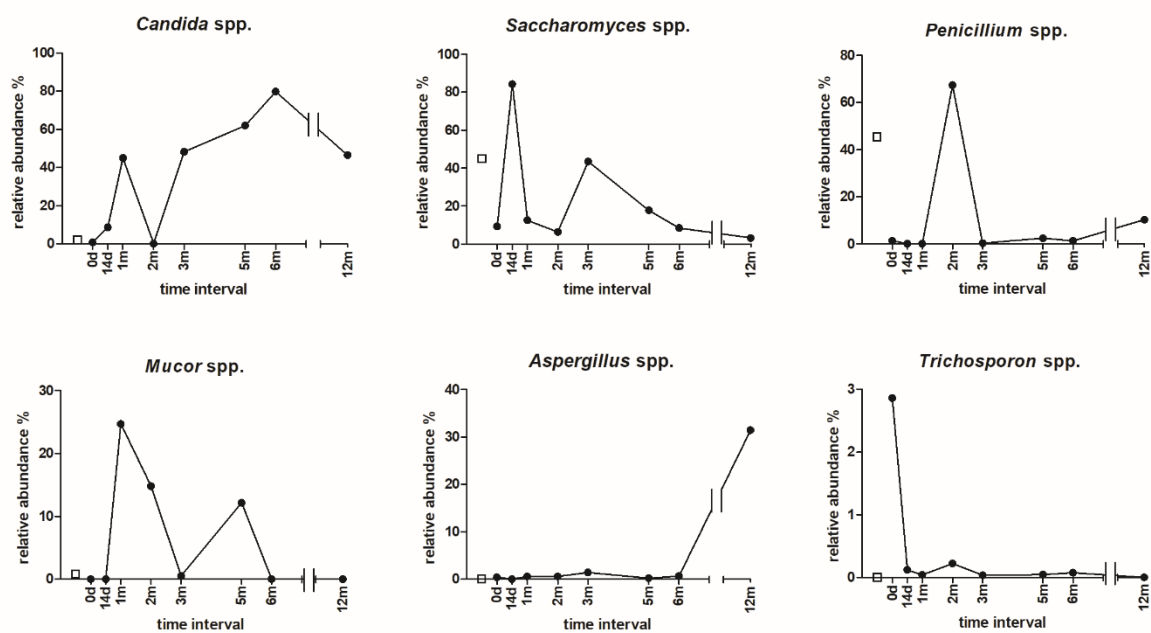

100

101

102

**Figure 1.** The relative abundance of assorted fungal species present in stool samples. Patient's values are represented by black circles, donor value is represented by the empty square.

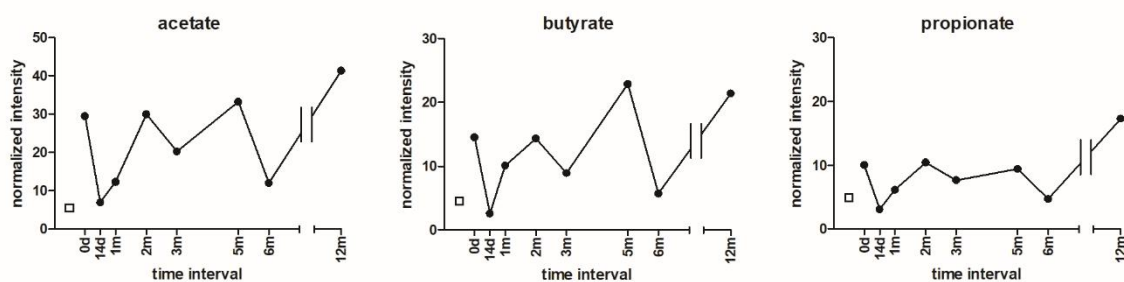

103

104

**Figure 2.** Acetate, butyrate, and propionate levels in stool samples.

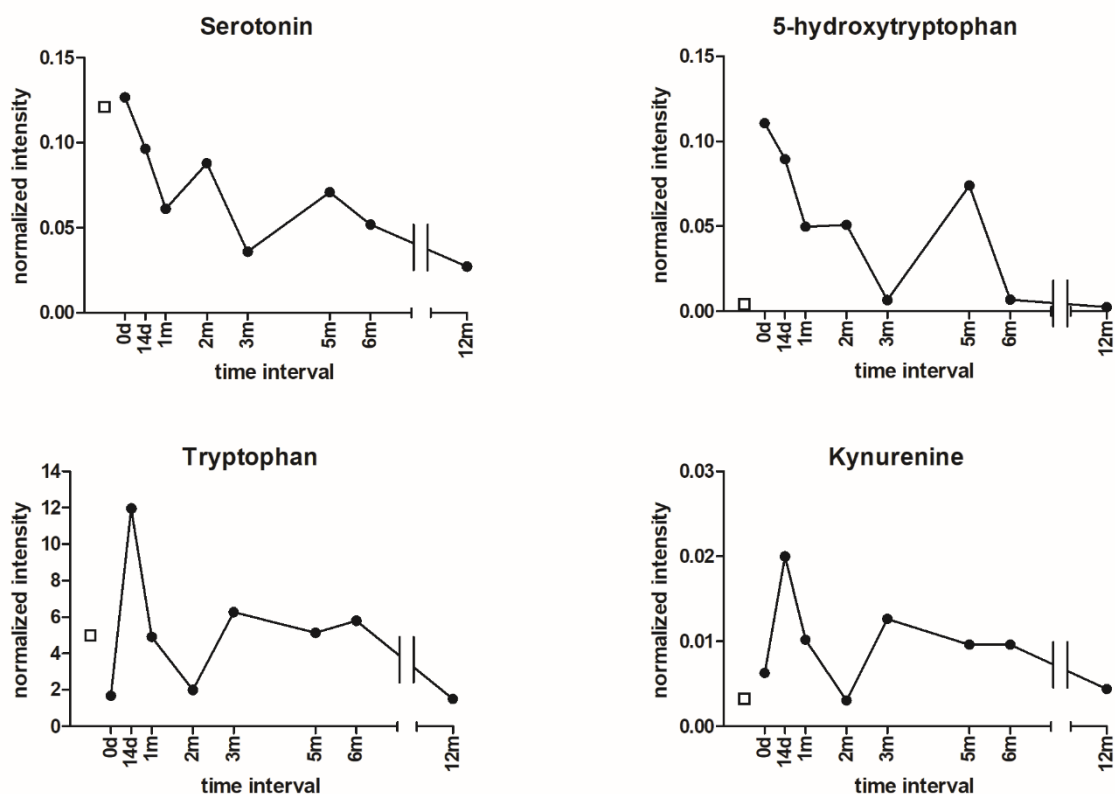

105

106

**Figure 3.** Serotonin, 5-hydroxytryptophan, kynurenine, and tryptophan levels in stool samples.

107

## 108 References

- 109 1. Dieterle, F.; Ross, A.; Schlotterbeck, G.; Senn, H. Probabilistic quotient normalization as robust method to  
 110 account for dilution of complex biological mixtures. Application in 1H NMR metabolomics. *Anal Chem*  
 111 **2006**, *78*, 4281-4290, doi:10.1021/ac051632c.
- 112 2. Collado, M.C.; Derrien, M.; Isolauri, E.; de Vos, W.M.; Salminen, S. Intestinal integrity and *Akkermansia*  
 113 *muciniphila*, a mucin-degrading member of the intestinal microbiota present in infants, adults, and the  
 114 elderly. *Appl Environ Microbiol* **2007**, *73*, 7767-7770, doi:10.1128/AEM.01477-07.
- 115 3. Denman, S.E.; McSweeney, C.S. Development of a real-time PCR assay for monitoring anaerobic fungal  
 116 and cellulolytic bacterial populations within the rumen. *FEMS Microbiol Ecol* **2006**, *58*, 572-582,  
 117 doi:10.1111/j.1574-6941.2006.00190.x.
- 118 4. Dridi, B.; Henry, M.; El Khechine, A.; Raoult, D.; Drancourt, M. High prevalence of *Methanobrevibacter*  
 119 *smithii* and *Methanosphaera stadtmanae* detected in the human gut using an improved DNA detection  
 120 protocol. *PLoS One* **2009**, *4*, e7063, doi:10.1371/journal.pone.0007063.
- 121 5. Caporaso, J.G.; Lauber, C.L.; Walters, W.A.; Berg-Lyons, D.; Lozupone, C.A.; Turnbaugh, P.J.; Fierer, N.;  
 122 Knight, R. Global patterns of 16S rRNA diversity at a depth of millions of sequences per sample. *Proc Natl*  
 123 *Acad Sci U S A* **2011**, *108 Suppl 1*, 4516-4522, doi:10.1073/pnas.1000080107.
- 124 6. Ihrmark, K.; Bodeker, I.T.; Cruz-Martinez, K.; Friberg, H.; Kubartova, A.; Schenck, J.; Strid, Y.; Stenlid, J.;  
 125 Brandstrom-Durling, M.; Clemmensen, K.E., et al. New primers to amplify the fungal ITS2 region--  
 126 evaluation by 454-sequencing of artificial and natural communities. *FEMS Microbiol Ecol* **2012**, *82*, 666-677,  
 127 doi:10.1111/j.1574-6941.2012.01437.x.
- 128 7. Vetrovsky, T.; Baldrian, P.; Morais, D.; Berger, B. SEED 2: a user-friendly platform for amplicon high-  
 129 throughput sequencing data analyses. *Bioinformatics* **2018**, *34*, 10.1093/bioinformatics/bty071,  
 130 doi:10.1093/bioinformatics/bty071.
- 131 8. Aronesty, E. Comparison of sequencing utility programs. *Open Bioinformatics J* **2013**, *7*, 1-8.

- 132 9. Edgar, R.C. UPARSE: highly accurate OTU sequences from microbial amplicon reads. *Nat Methods* **2013**,  
133 10, 996, doi:10.1038/Nmeth.2604.
- 134 10. Cole, J.R.; Wang, Q.; Fish, J.A.; Chai, B.L.; McGarrell, D.M.; Sun, Y.N.; Brown, C.T.; Porras-Alfaro, A.;  
135 Kuske, C.R.; Tiedje, J.M. Ribosomal Database Project: data and tools for high throughput rRNA analysis.  
136 *Nucleic Acids Res* **2014**, *42*, D633-D642.
- 137 11. Nilsson, R.H.; Larsson, K.H.; Taylor, A.F.S.; Bengtsson-Palme, J.; Jeppesen, T.S.; Schigel, D.; Kennedy, P.;  
138 Picard, K.; Glockner, F.O.; Tedersoo, L., et al. The UNITE database for molecular identification of fungi:  
139 handling dark taxa and parallel taxonomic classifications. *Nucleic Acids Res* **2019**, *47*, D259-D264,  
140 doi:10.1093/nar/gky1022.
